# Supplementary material for: Interfacial chemistry governs SERS detectability of trimethoprim and ketoprofen: adsorption geometry and chloride-mediated activation
Source: Royal Society of Chemistry journal article supplement (doi:10.1039/d5ra07249b), 2025-01-01
Supplement: d5ra07249b1.pdf [file d5ra07249b1.pdf]

## Supporting Information for

### **Interfacial Chemistry Governs SERS Detectability of Trimethoprim and Ketoprofen: Adsorption Geometry and Chloride-Mediated Activation**

Dao Thi Nguyet Nga<sup>a,1</sup>, Ha Anh Nguyen<sup>a,\*,1</sup>, Mai Quan Doan<sup>a</sup>, Anh-Tuan Le<sup>a,\*\*</sup>

<sup>a</sup>*Phenikaa University Nano Institute (PHENA), Phenikaa School of Engineering (PSE),*

*Phenikaa University, Hanoi 12116, Vietnam*

Corresponding authors:

\*[anh.nguyenha@phenikaa-uni.edu.vn](mailto:anh.nguyenha@phenikaa-uni.edu.vn) (H.A.Nguyen)

\*\*[tuan.leanh@phenikaa-uni.edu.vn](mailto:tuan.leanh@phenikaa-uni.edu.vn) (A.T.Le)

<sup>1</sup> D.T.N. Nga and H.A. Nguyen contributed equally to this work

#### **Calculation of limit of detection (LOD)**

The standard curve of linear detecting range was given as:

$$Y = A + B \times \text{Log}(X) \tag{1}$$

where A and B are intercept and slope of regression equation obtained through the plot of the logarithmic SERS intensity (Y) – logarithmic concentration (X).

The LOD is calculated using the following equation <sup>1</sup>

$$\text{LOD} = 10^{\left[ (Y_{\text{blank}} + 3SD) / Y_{\text{blank}} - A \right] / B} \tag{2}$$

where  $Y_{\text{blank}}$  and SD are the SERS signal and the standard deviation of blank sample, respectively.

SD is calculated via the well-known formula:

$$SD = \sqrt{\frac{1}{n-1} \times \sum_i^n (x_i - x_{average})^2} \quad (3)$$

where  $x_i$  is the “i” sample of the series of measurements,  $x_{average}$  is the average value of SERS signal obtained from the blank sample repeated n times.

### **Calculation of relative standard deviation (RSD)**

The RSD value of repeatability and reproducibility is calculated via the well-known formula:

$$RSD = \frac{SD \times 100}{x_{average}}$$

(4)

where SD is the standard deviation that calculates using equation 3 and  $x_{average}$  is the average value of SERS signal obtained from each measurement.

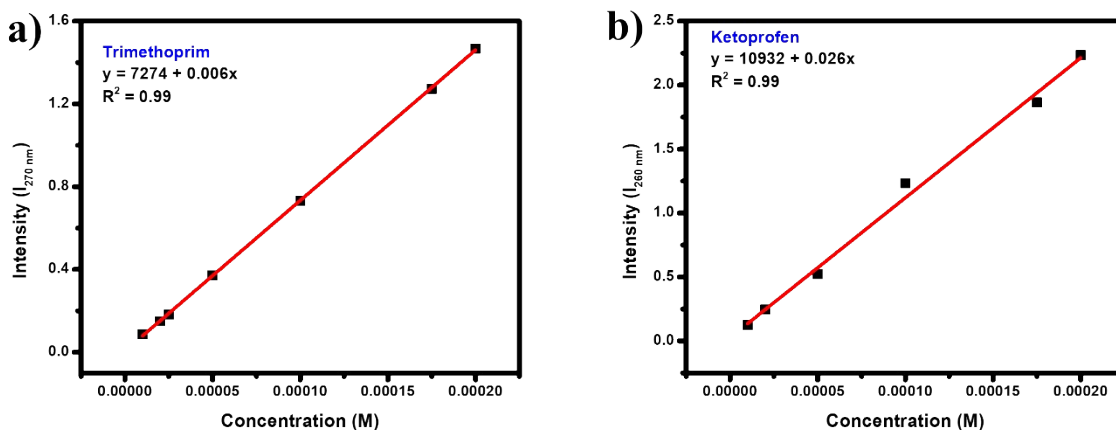

Figure S1: Plot of the SERS intensity at 270nm and 260 nm against (a) Trimethoprim and (b) Ketoprofen concentration in the standard solution.

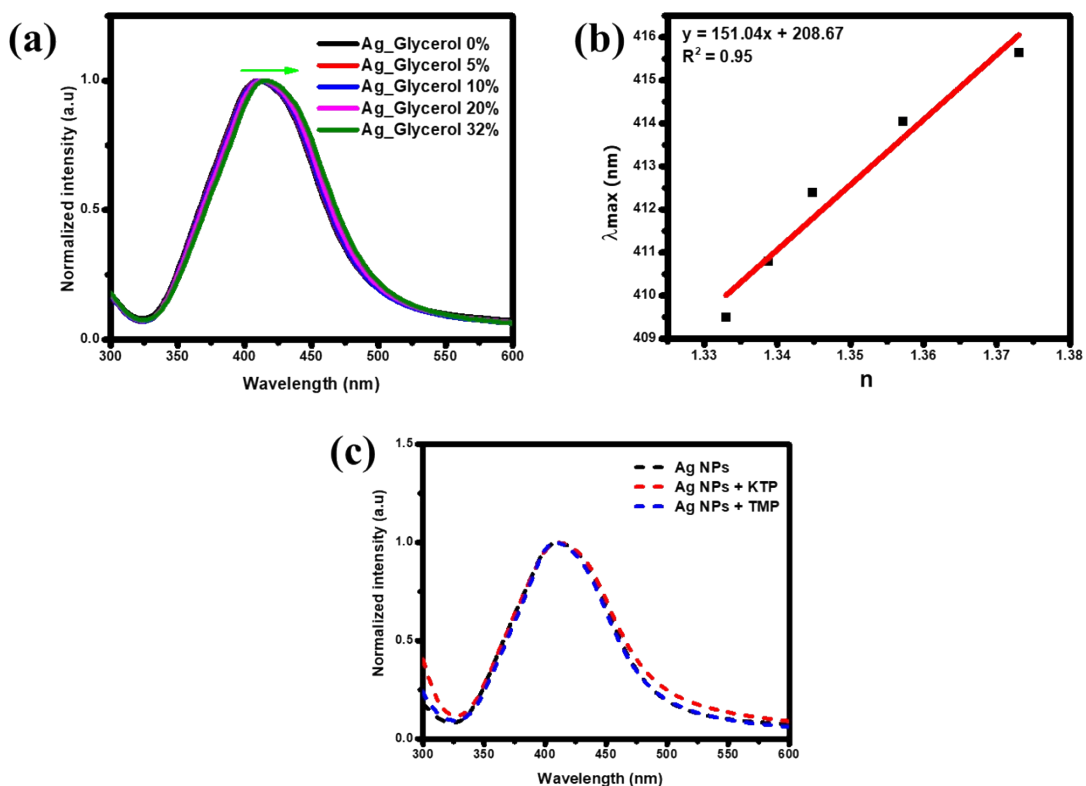

Figure S2: (a) Normalized adsorption spectra of *e*-AgNPs in glycerol (0 – 32%); (b) Plot of  $\lambda_{\text{max}}$  of the absorption spectra of *e*-AgNPs in glycerol (0 – 32%) versus  $n$  measured by refractometer; (c) Normalized adsorption spectra of *e*-AgNPs in the presence of TMP and KTP (1.75 × 10<sup>-4</sup> M) in comparison with that of pure *e*-AgNPs.

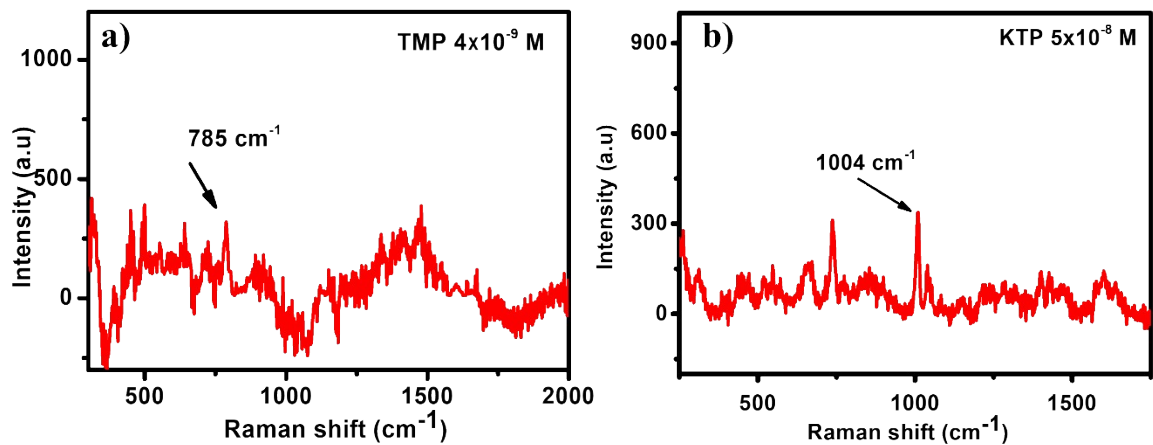

Figure S3: SERS spectra of (a) TMP ( $4 \times 10^{-9}$  M) and (b) KTP ( $5 \times 10^{-8}$  M) on e-AgNPs

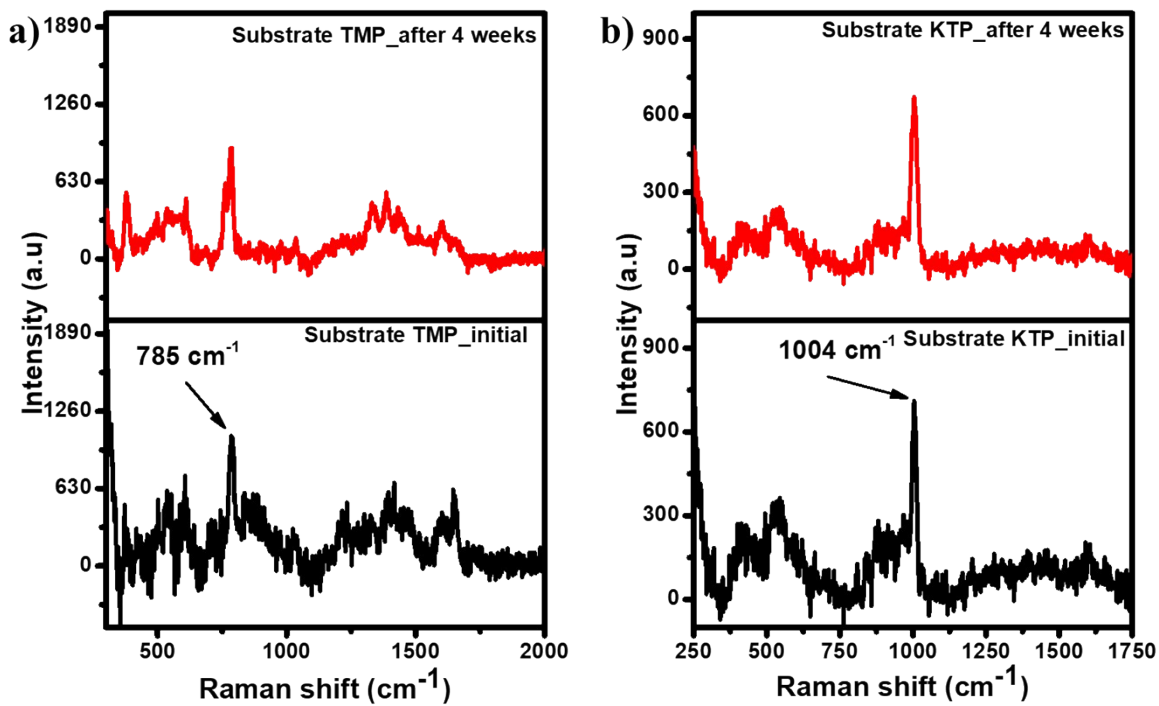

Figure S4: SERS spectra of (a) TMP and (b) KTP on freshly prepared and 4-week stored e-AgNPs.

**Table S1: The recovery values for four concentrations of trimethoprim in the tap-water sample.**

| <b>Real sample</b> | <b>Analyte</b> | <b>Concentration of TCZ (M)</b> | <b>Recovery (%)</b> |
|--------------------|----------------|---------------------------------|---------------------|
| Tap-water          | Trimethoprim   | $10^{-4}$                       | 96                  |
|                    |                | $10^{-5}$                       | 89                  |
|                    |                | $10^{-6}$                       | 91                  |
|                    |                | $10^{-7}$                       | 93                  |

**Table S2: The recovery values for four concentrations of ketoprofen in the tap-water sample.**

| <b>Real sample</b> | <b>Analyte</b> | <b>Concentration of TCZ (M)</b> | <b>Recovery (%)</b> |
|--------------------|----------------|---------------------------------|---------------------|
| Tap-water          | Ketoprofen     | $10^{-4}$                       | 93                  |
|                    |                | $10^{-5}$                       | 95                  |
|                    |                | $10^{-6}$                       | 92                  |
|                    |                | $10^{-7}$                       | 88                  |

## References

- (1) Chen, R.; Shi, H.; Meng, X.; Su, Y.; Wang, H.; He, Y. Dual-Amplification Strategy-Based SERS Chip for Sensitive and Reproducible Detection of DNA Methyltransferase Activity in Human Serum. *Anal. Chem.* **2019**, *91* (5), 3597–3603. <https://doi.org/10.1021/acs.analchem.8b05595>.
